# Supplementary material for: RB Maintains Quiescence and Prevents Premature Senescence through Upregulation of DNMT1 in Mesenchymal Stromal Cells
Source: PubMed Central journal article supplement — Stem Cell Reports. 2014 Nov 6;3(6):975–86. doi: 10.1016/j.stemcr.2014.10.002 (PMC4264040; doi:10.1016/j.stemcr.2014.10.002), 2014-11-06
Supplement: mmc1.pdf [file mmc1.pdf]

Stem Cell Reports, Volume 3

Supplemental Information

**RB Maintains Quiescence and Prevents  
Premature Senescence through Upregulation  
of DNMT1 in Mesenchymal Stromal Cells**

Shih-Pei Lin, Fang-Yao Chiu, Yu Wang, Men-Luh Yen, Shou-Yen Kao, and Shih-Chieh Hung

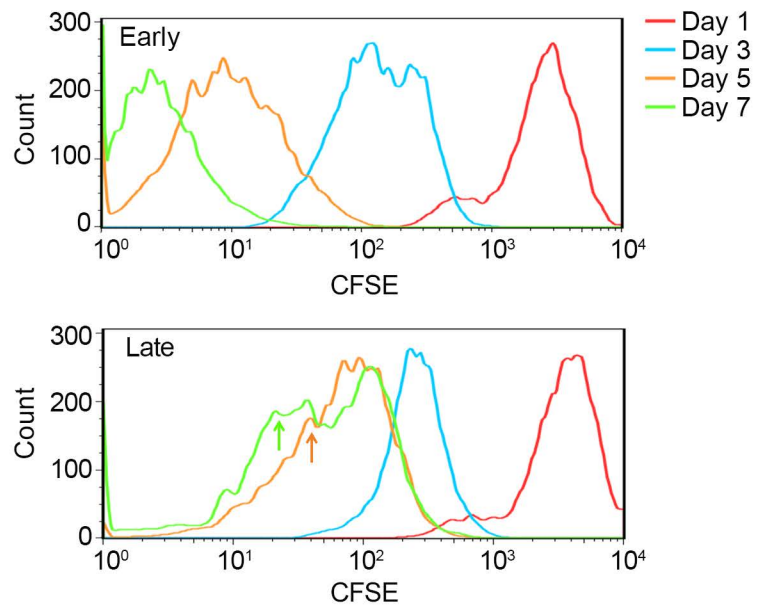

Figure S1

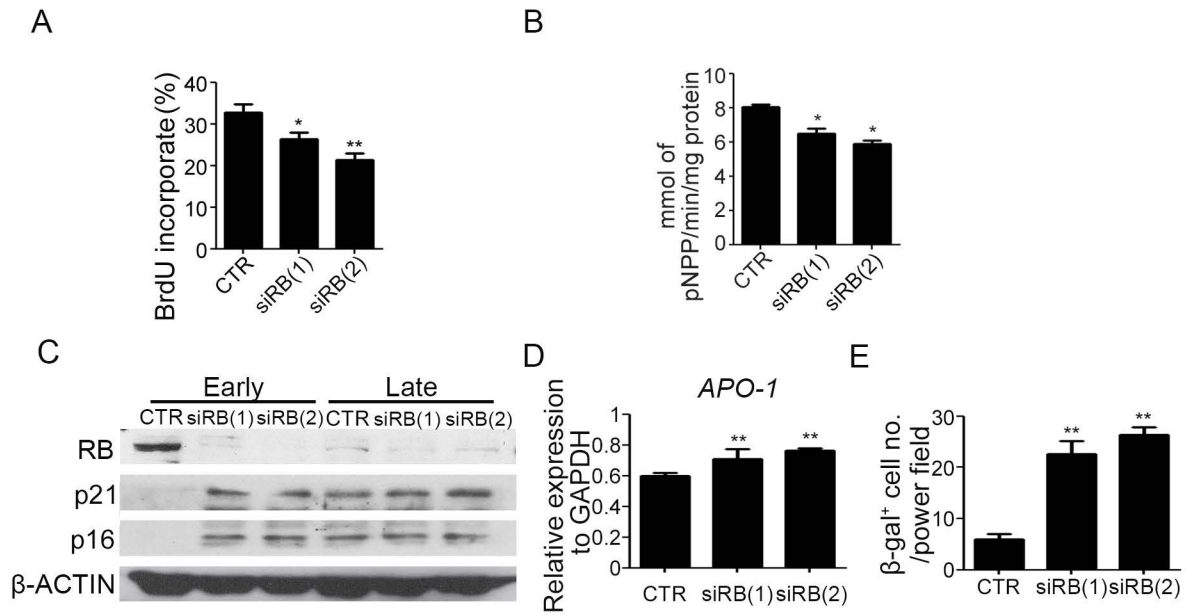

Figure S2

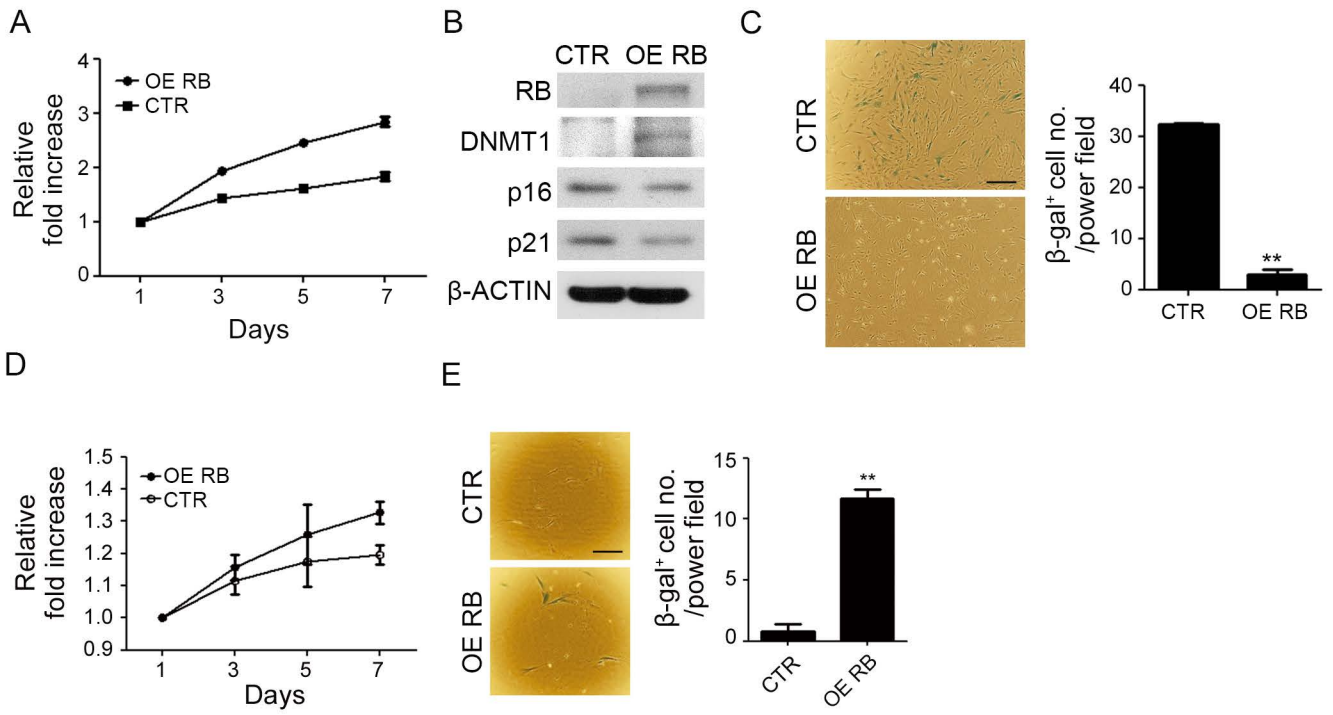

Figure S3

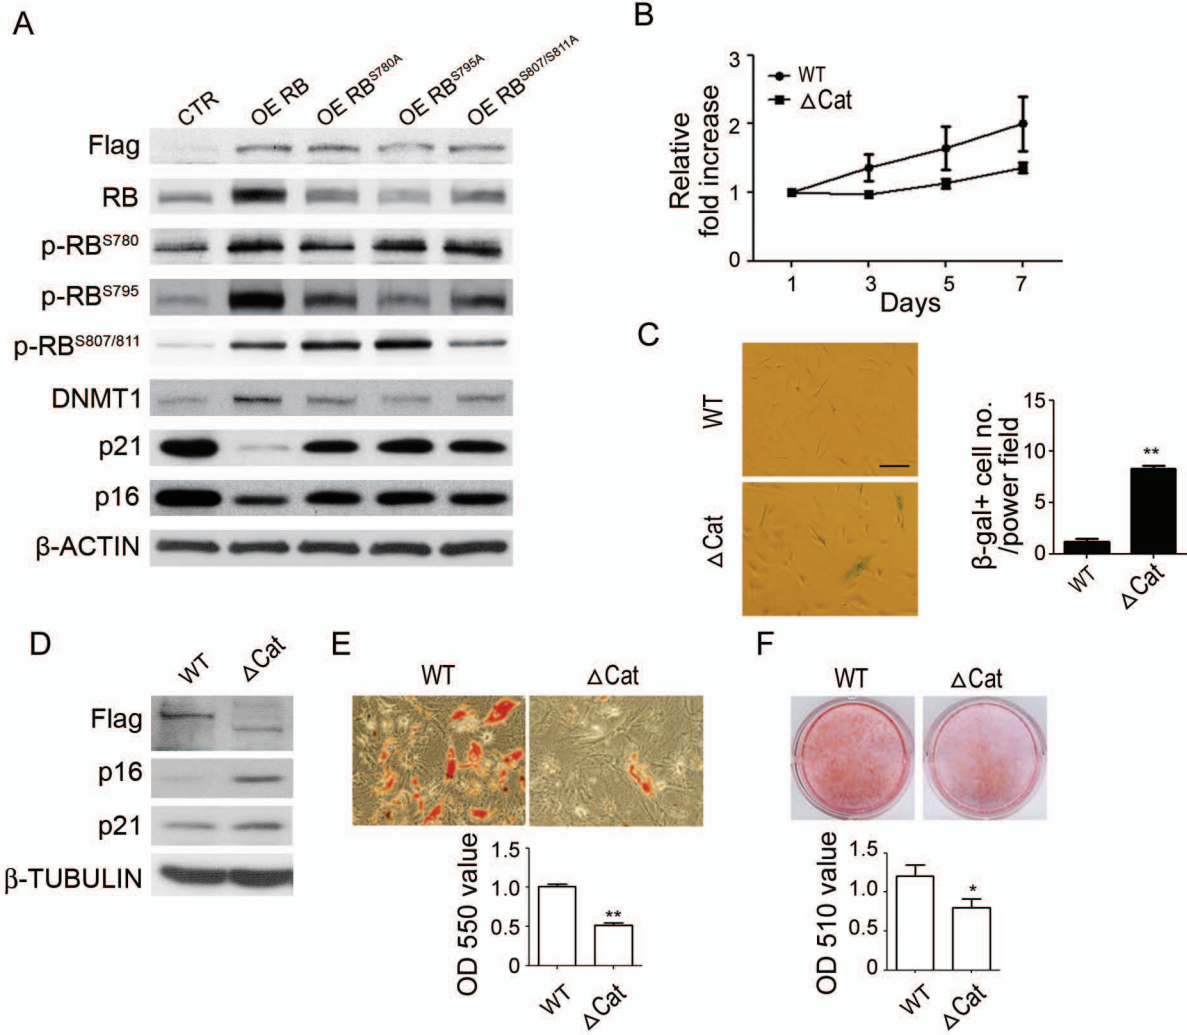

Figure S4

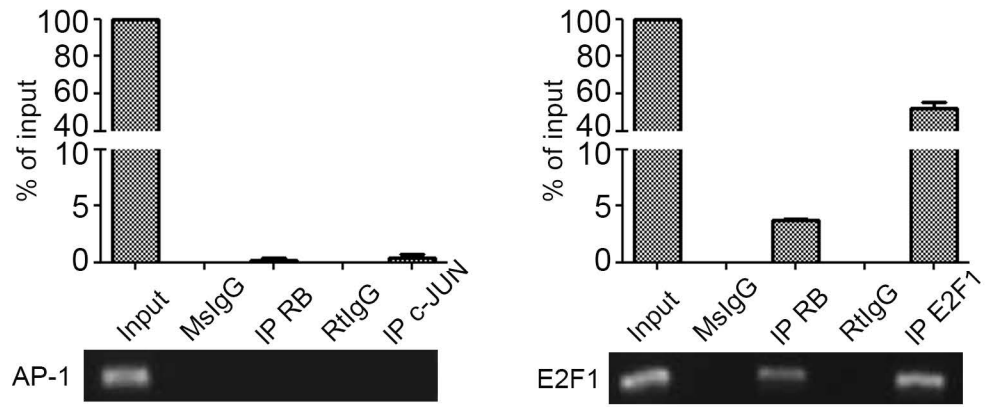

Figure S5

## Supplemental Figures Legends

**FigureS1. Early-passage MSCs replicate as a more homogenous population than late-passage MSCs.** Related to Figure 1. Carboxyfluorescein (CFSE) dye dilution assay for detecting cell proliferation rate. Aliquots of  $10^5$  CFSE labeled early- and late-passage MSCs were seeded in 10-cm dishes and incubated for 1, 3, 5, 7 days. Fluorescence of MSCs was quantified by flow cytometry. At day 5 and day 7, late-passage MSCs were separated into two groups. Only a portion of cells (arrow) replicated at a speed slower than early-passage MSCs, while the rest of the cells stopped replication.

**Figure S2. Knockdown of RB in early-passage MSCs decreased BrdU incorporation rate, alkaline phosphatase activity and induced premature expression of senescence markers.** Related to Figure 2. (A) MSCs without or with RB knockdown were seeded at  $2 \times 10^5$  in 10-cm dishes for 48 h, bromodeoxyuridine (BrdU) were added into each dish and incubated for 18 h, and then detected by flow cytometry. (B) Alkaline phosphatase activity was analyzed at 1 week. (C) Western blot analysis, (D) quantitative RT-PCR, and (E)  $\beta$ -galactosidase staining of MSCs without or with RB knockdown. The results are expressed as mean  $\pm$  SD of three independent experiments. Asterisks indicate significant differences (\*\*P < 0.01).

**Figure S3. Over-expression of RB affected proliferation rate and expression of senescence markers in late-passage MSCs and IMR90 cells.** Related to Figure 3. (A-C) Over-expression of RB via retroviral transduction in late passage MSCs increased proliferation rate and reduced senescence markers. Late-passage MSCs were retroviral transduced with control (CTR) or RB overexpression vectors (OE RB). (A) MSCs without or with RB overexpression were seeded at  $4.5 \times 10^3$  /cm<sup>2</sup> and cultured for 7 days. MTT assay was performed at indicated period, and data are shown as relative fold increase. (B) Western blot analysis. (C)  $\beta$ -galactosidase staining of MSCs without or with RB overexpression. Bar = 100  $\mu$ m. (D-E) Over-expression of RB in IMR90 reduced proliferation rate and increased senescence marker. IMR90 cells transfected with control (CTR) or RB overexpression vectors (OE RB) were seeded at  $4.5 \times 10^3$ /cm<sup>2</sup> and cultured for 7 days. (D) MTT assay was performed at indicated period, and data are shown as relative fold increase. (E)  $\beta$ -galactosidase staining. Bar = 50  $\mu$ m. The results are expressed as mean  $\pm$  SD of three independent experiments. Asterisks indicate significant differences (\*\*P < 0.01).

**Figure S4. RB maintains proliferation rate, differentiation potential and reduces senescence markers through up-regulation of DNMT1 in MSCs.** Related to Figure 4. (A) Loss-of-function mutations in each of the phosphorylation sites are associated with a decrease in the upregulation of DNMT1 by RB. Western blot analysis of late-passage MSCs overexpressed with wild-type RB or RB with indicated mutation (RB<sup>S780A</sup>, RB<sup>S795A</sup>, or RB<sup>S807/811A</sup>). The MSCs overexpressed loss of function mutated RB decreased in the upregulation of DNMT1 and the downregulation of p21 and p16. (B-F) Over-expression of DNMT but not catalytic domain truncated DNMT1 in late passage MSCs increased proliferation rate, *in vitro* osteogenic and adipogenic differentiation potential, and reduced senescence markers. Late-passage MSCs transfected with full length (WT) or catalytic domain truncated ( $\Delta$ Cat) DNMT1 overexpression vectors were seeded at  $4.5 \times 10^3$  /cm<sup>2</sup> and cultured for 7 days. (B) MTT assay was performed at indicated period, and data are shown as relative fold increase. (C)  $\beta$ -galactosidase staining. (D) Western blot analysis. (E) Cells were treated with adipogenic induction medium for 2 weeks followed by staining with Oil Red O. Upper panel shows representative pictures of Oil Red O staining at 2 weeks. Lower panel shows optical density measurement of extracted Oil Red O staining. (F) Cells were treated with osteogenic induction medium followed by staining with Alizarin Red S. Upper panel shows representative pictures of Alizarin Red S staining at 2 weeks. Lower panel shows optical density measurement of extracted Alizarin Red S staining. The results are expressed as mean  $\pm$  SD of three independent experiments. Asterisks indicate significant differences (\*P < 0.05, \*\*P < 0.01). Bar = 50  $\mu$ m.

**Figure S5. RB does not bind to c-JUN in the DNMT1 promoter of non-MSC cells ChIP assay of H1299 cells.** Related to Figure 5. The chromatin was incubated with antibodies against RB, c-JUN or E2F1 or their isotype IgG antibodies. Fragments of AP-1 (left panel) and E2F1 site (right panel) on DNMT1 promoter were amplified by PCR (lower panel) and quantitative PCR (upper panel). Input, 1% of total input lysate. The results are expressed as mean  $\pm$  SD of three independent experiments. MsIgG, mouse IgG2a is the isotype of anti-RB antibody. RtIgG, rabbit IgG is the isotype of anti-c-JUN and anti-E2F1 antibody.



**Table S1. Primer sequences for real-time PCR. Related to experimental procedures.**

| <b>Primer name</b>  | <b>Primer sequences</b>              |
|---------------------|--------------------------------------|
| <i>RB</i> F         | 5'-GCTAGCCTATCTCCGGCTAAA-3'          |
| <i>RB</i> R         | 5'-CTGGAAAAGGGTCCAGATGA-3'           |
| <i>LPL</i> F        | 5'- CCCTAAGGACCCCTGAAGAC-3'          |
| <i>LPL</i> R        | 5'- GGTTTTGCTGCTGTGATTGA-3'          |
| <i>PPAR-γ2</i> F    | 5'-CCTATTGACCCAGAAAGCGATTC-3'        |
| <i>PPAR-γ2</i> R    | 5'-GCATTATGAGACATCCCCACTGC-3'        |
| <i>RUNX2</i> F      | 5'-TTCAGGAGGGAGAAGAGCAA-3'           |
| <i>RUNX2</i> R      | 5'-TGGTTTTGTGAGCTGTCTGC-3'           |
| <i>BSP</i> F        | 5'-AACCTACAACCCACCACAA-3'            |
| <i>BSP</i> R        | 5'-GTTCCCCGTTCTCACTTTCA-3'           |
| <i>APO-1</i> F      | 5'-CAAGGGATTGGAATTGAGGA-3'           |
| <i>APO-1</i> R      | 5'-ACCTGGAGGACAGGGCTTAT-3'           |
| <i>DNMT1</i> F      | 5'-<br>ACCGCTTCTACTTCCTCGAGGCCTA-3'  |
| <i>DNMT1</i> R      | 5'-<br>GTTGCAGTCCTCTGTGAACACTGTGG-3' |
| <i>GAPDH</i> F      | 5'-CTCTGCTCCTCCTGTTTCGACA-3'         |
| <i>GAPDH</i> R      | 5'-ACGACCAAATCCGTTGACTC-3'           |
| <i>p16</i> F        | 5'-GCCTTTTCACTGTGTTGGAGTTT-3'        |
| <i>p16</i> R        | 5'-CGCAAGAAATGCCACATG-3'             |
| <i>p21</i> F        | 5'-GCCGAAGTCAGTTCCTT-3'              |
| <i>p21</i> R        | 5'-TCATGCTGGTCTGCCGC-3'              |
| <i>DNMT1-AP1-F</i>  | 5'-CCCCGTTTTACAGATGAGGA-3'           |
| <i>DNMT1-AP1-R</i>  | 5'- GGTTTGTGAGAGCCCTTGAG-3'          |
| <i>DNMT1-E2F1-F</i> | 5'-GCCTCTCTCCGTTTGGTACA-3'           |
| <i>DNMT1-E2F1-R</i> | 5'-TCGGAGGCTTCAGCAGAC-3'             |
